# Supplementary material
Source: PubMed Central journal article supplement (PMC6141012)

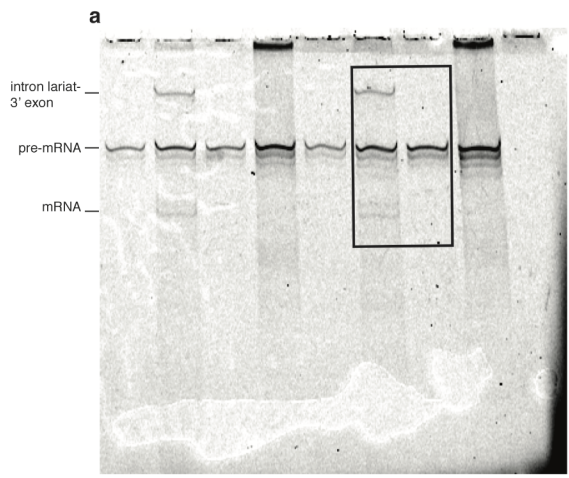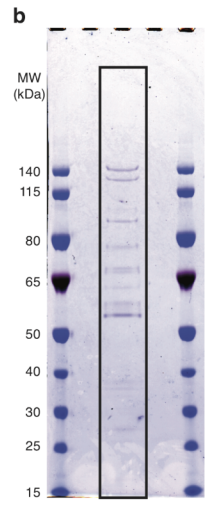

Supplement: NIHMS77805-supplement-Supplementary_figure_1.pdf [file NIHMS77805-supplement-Supplementary_figure_1.pdf]
